# Supplementary material for: The Behavioral Space of Zebrafish Locomotion and Its Neural Network Analog
Source: PLoS One. 2015 Jul 1;10(7):e0128668. doi: 10.1371/journal.pone.0128668 (PMC4489106; doi:10.1371/journal.pone.0128668)

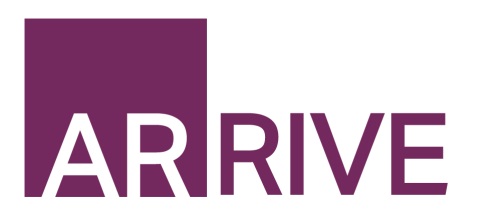


The ARRIVE Guidelines Checklist

Animal Research: Reporting In Vivo Experiments

Carol Kilkenny1, William J Browne2, Innes C Cuthill3, Michael Emerson4 and Douglas G Altman5

*1The National Centre for the Replacement, Refinement and Reduction of Animals in Research, London, UK, 2School of Veterinary Science, University of Bristol, Bristol, UK, 3School of Biological Sciences, University of Bristol, Bristol, UK, 4National Heart and Lung Institute, Imperial College London, UK, 5Centre for Statistics in Medicine, University of Oxford, Oxford, UK.*

|  | | ITEM | RECOMMENDATION | Section/ Paragraph |
| --- | --- | --- | --- | --- |
| 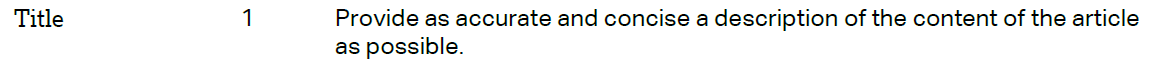 | | | Title |
| 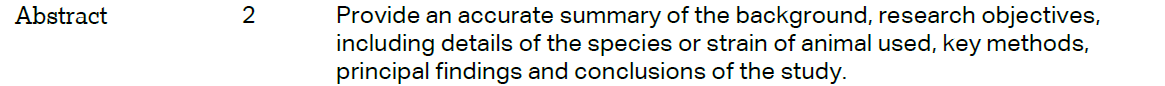 | | | Abstract |
| INTRODUCTION | | |  |
| 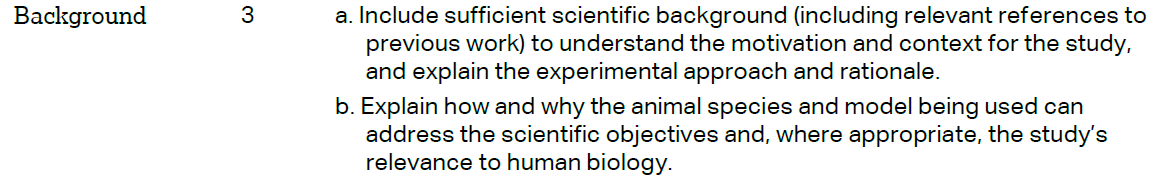 | | | Paragraph 1-4  Paragraph 5 |
| 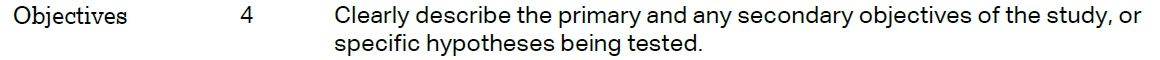 | | | Paragraph 4-5 |
| METHODS | | |  |
| 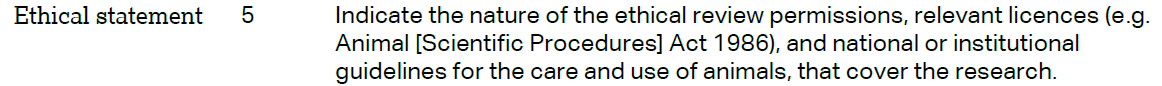 | | | Paragraph 1 |
| 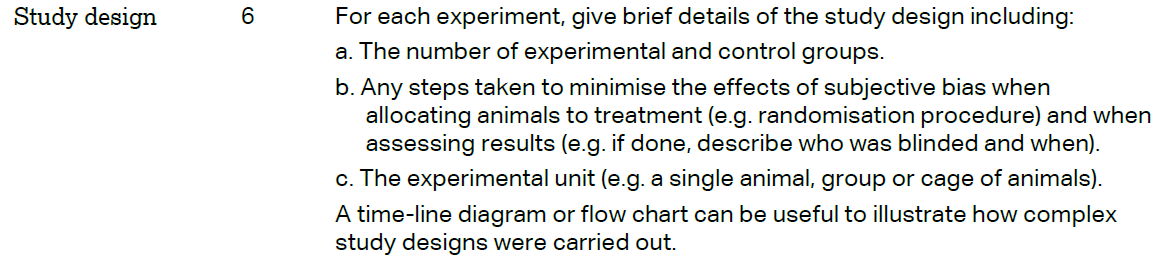 | | | Paragraph 4  N/A  Paragraph 4 |
| 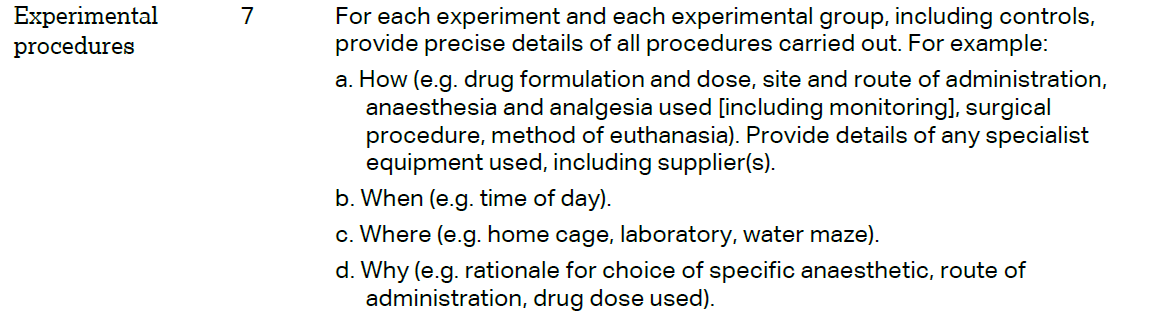 | | | Paragraph 2  Paragraph 2  Paragraph 2  Paragraph 2 |
| 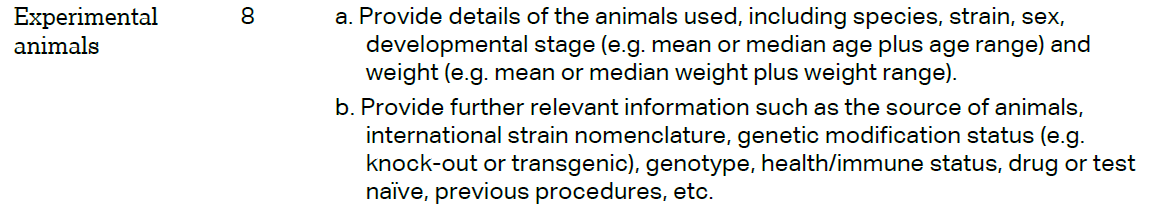 | | | Paragraph 2  Paragraph 2 |

The ARRIVE guidelines. Originally published in *PLoS Biology*, June 20101

| 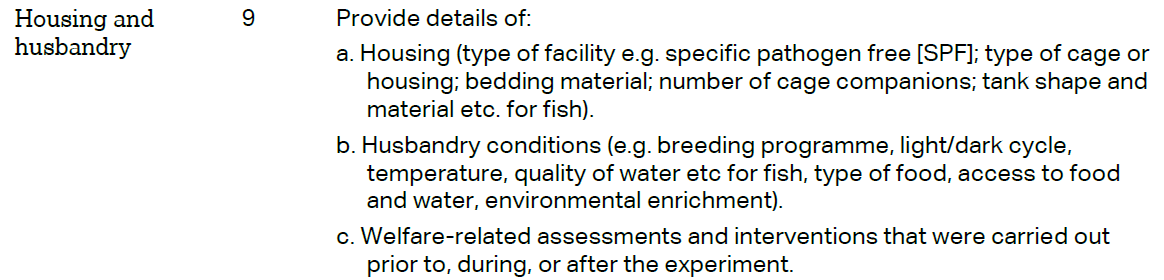 | Paragraph 2  Paragraph 2  Paragraph 2 | |
| --- | --- | --- |
| 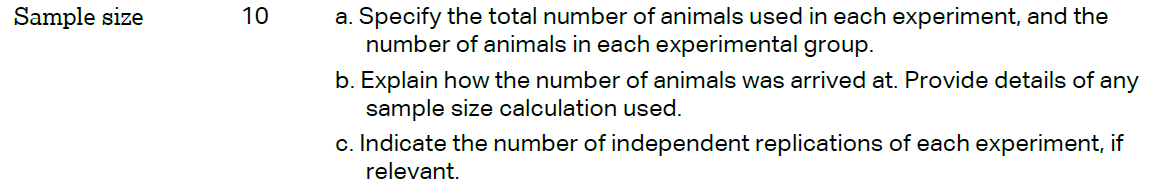 | Paragraph 1, 4  N/A  N/A | |
| 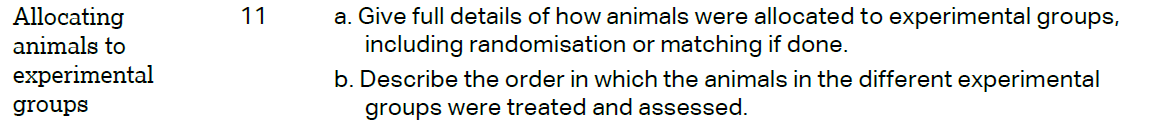 | N/A  N/A | |
| 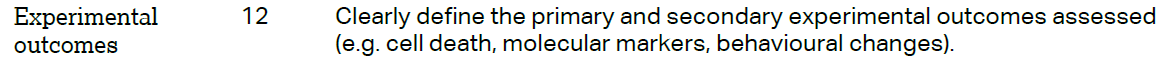 | Throughout the results section | |
| 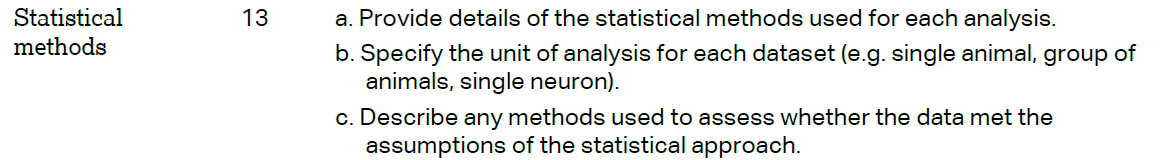 | Paragraph 6  Paragraph 4  Results/Paragraph 8 | |
| RESULTS |  | |
| 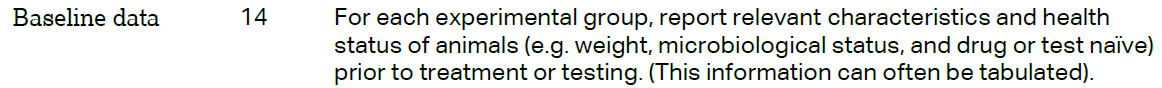 | Materials and Methods/  Paragraph 2 | |
| 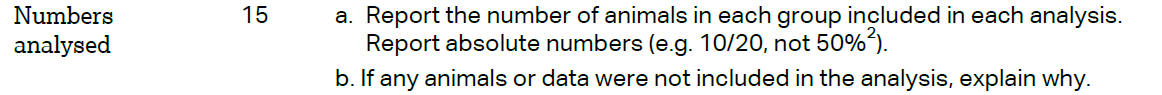 | Figure 4  N/A | |
| 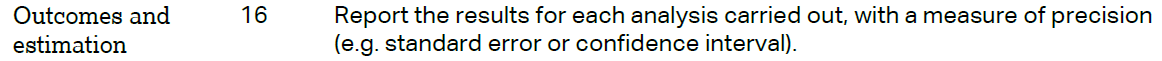 | Figure 2 and Figure S7A | |
| 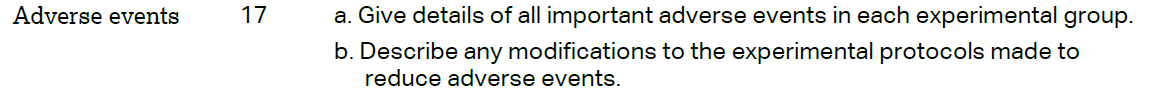 | N/A  N/A | |
| DISCUSSION |  | |
| 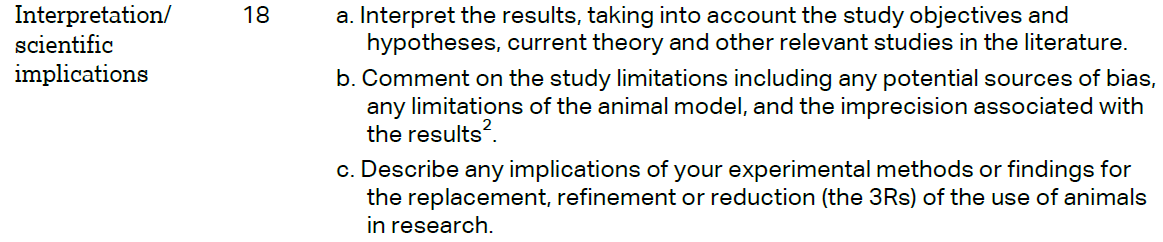 | Throughout  Paragraph 5  N/A | |
| 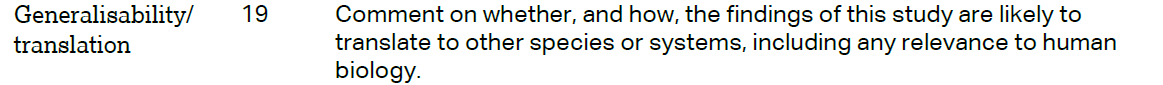 | N/A | |
| 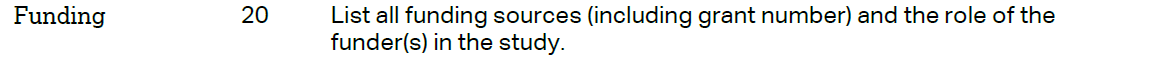 | |  |


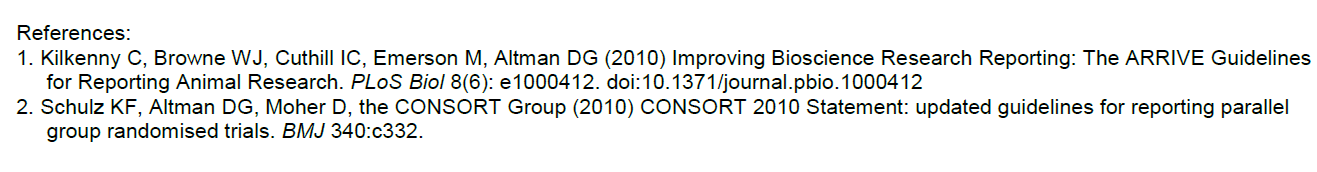

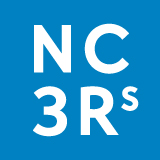

Supplement: S1 ARRIVE Checklist — (DOCX) [file pone.0128668.s001.docx]
